# Supplementary material for: Lysosomal sorting receptors are essential for secretory granule biogenesis in Tetrahymena
Source: PubMed Central journal article supplement — J Cell Biol. 2013 Nov 11;203(3):537–50. doi: 10.1083/jcb.201305086 (PMC3824020; doi:10.1083/jcb.201305086), 2013-11-11
Supplement: supp_jcb.201305086_JCB_201305086_sm.pdf [file supp_jcb.201305086_JCB_201305086_sm.pdf]

Briguglio et al., <http://www.jcb.org/cgi/content/full/jcb.201305086/DC1>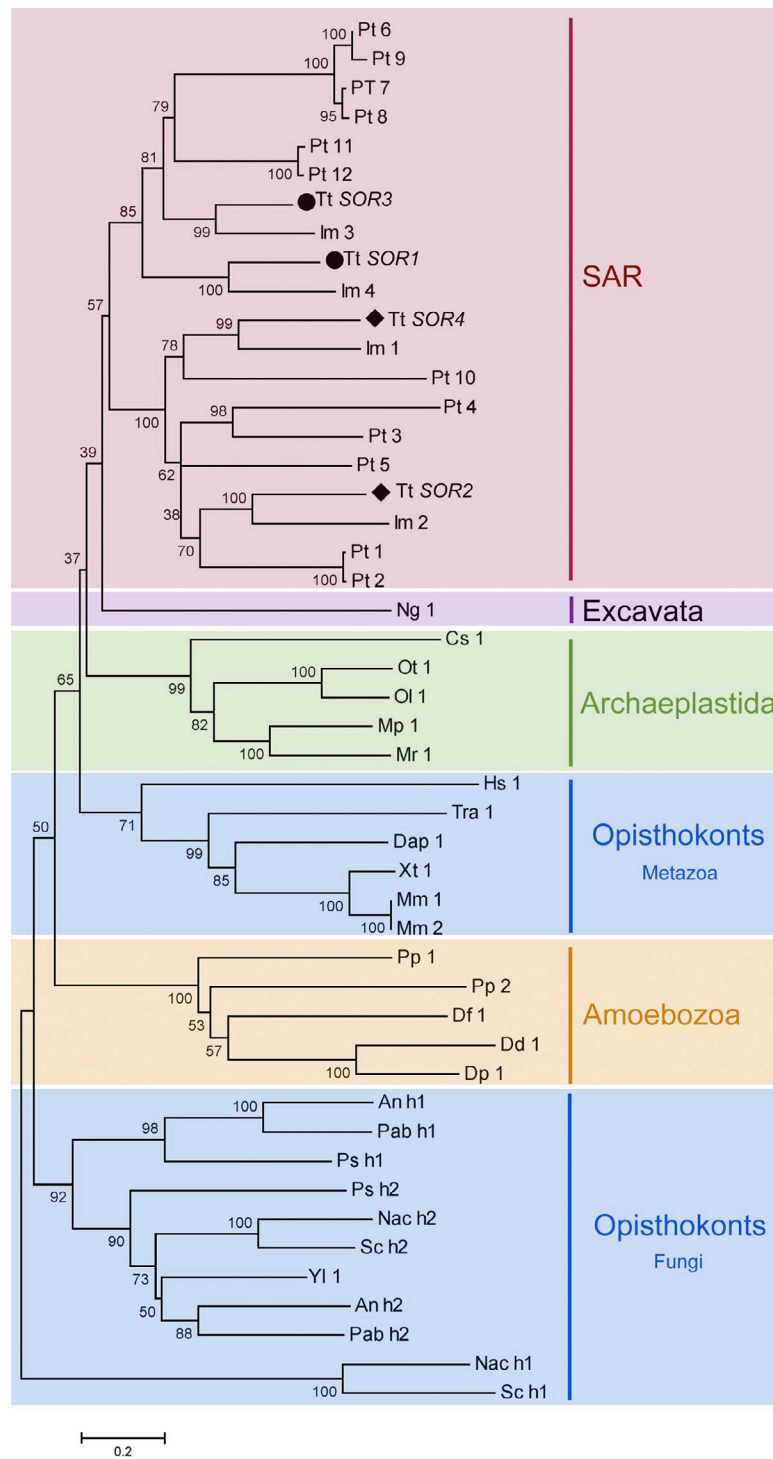

Figure S1. **The *T. thermophila* sortilins fall into two major groups.** Phylogenetic analysis of the VPS10 domains presented in Fig. 1, but here using the Neighbor-Joining method, also infers a similar evolutionary history for VPS10 domains from the major eukaryotic lineages. In some fungi, VPS10 domains are present as tandem repeats, depicted as h1 and h2. Species are abbreviated as follows: *A. nidulans* (An), *C. subellipsoidea* (Cs), *D. pulex* (Dap), *D. discoideum* (Dd), *D. fasciculatum* (Df), *D. purpureum* (Dp), *H. sapiens* (Hs), *I. multifiliis* (Im), *M. pusilla* (Mp), *Micromonas* sp. RCC299 (Mr), *M. musculus* (Mm), *N. gruberi* (Ng), *N. castellii* (Nac), *O. lucimarinus* (Ol), *O. tauri* (Ot), *P. brasiliensis* (Pab), *P. tetraurelia* (Pt), *P. pallidum* (Pp), *P. strigosozonata* (Ps), *S. cerevisiae* (Sc), *T. thermophila* (Tt), *T. adhaerens* (Tra), *X. (Silurana) tropicalis* (Xt), *Y. lipolytica* (Yl). See Table S1 for a list of accession numbers for the sequences used to assemble this phylogeny.

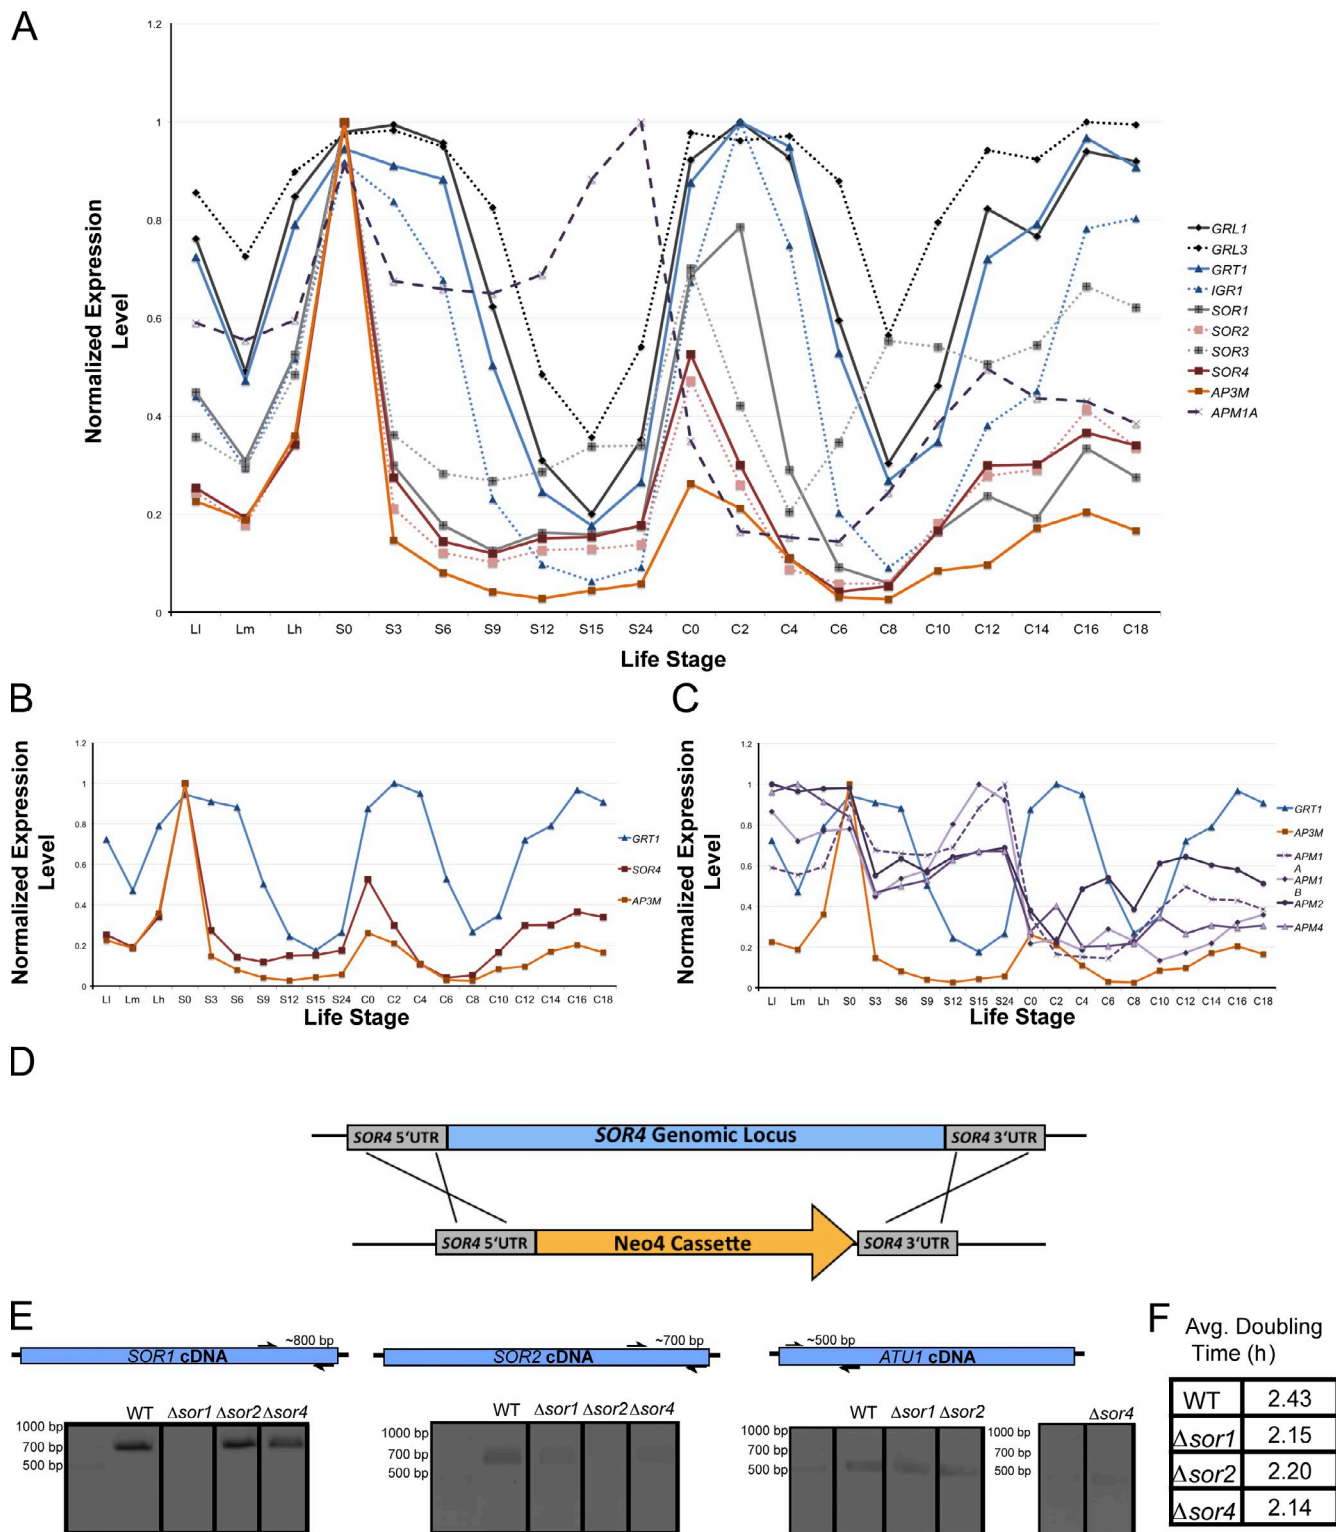

Figure S2. **Expression profiling identifies genes associated with mucocysts, including sortilins.** Expression profiles are derived from the Tetrahymena Functional Genomics Database, with each profile normalized to that gene's maximum expression level. Points on the x axis correspond to successive time points and represent growing, starved, and mating cultures, including three different culture densities (low [Ll], medium [Lm], and high [Lh]), 7 samples taken during 24 h of starvation, and 10 samples subsequently taken during the 18 h after conjugation. (A) A composite image of all the expression profiles in Fig. 2 A with the addition of AP-3 and AP-1A expression profiles. (B) The medium subunit of the AP-3 adaptor is coexpressed with genes encoding mucocyst contents and the four *T. thermophila* sortilins (only *GRT1* and *SOR4* are depicted for reference). (C) The medium subunits of the remaining adaptor complexes (AP-1A and -1B, AP-2, and AP-4) are not coexpressed with mucocyst-associated genes or the *T. thermophila* sortilins (*GRT1* and *SOR4* shown for reference). (D) Schematic of the *SOR4* knockout construct. Replacement of the entire *SOR4* genomic locus with the neo4 drug resistance cassette is facilitated by homologous recombination. An identical strategy was used for the remaining sortilins. A detailed description of the construction and use of the *SOR1-4* knockout constructs can be found in the Materials and methods section. (E) Independent cDNA prepared from the sortilin knockouts, as in Fig. 2 C, also shows that knockout cells lack the expected transcript, without affecting transcript abundance of other sortilin genes. The unrelated  $\alpha$ -tubulin (*ATU1*) cDNA serves as a loading control. The lanes shown were derived from a single gel, but their order has been rearranged for this figure. (F) Knockout of nonessential sortilins does not impair cell growth. Shown is a table of the mean doubling times calculated from five measurements of culture density (three measurements for  $\Delta sor1$ ), each after 3-h periods of growth, indicating similar growth rates for the wild-type and mutant lines.

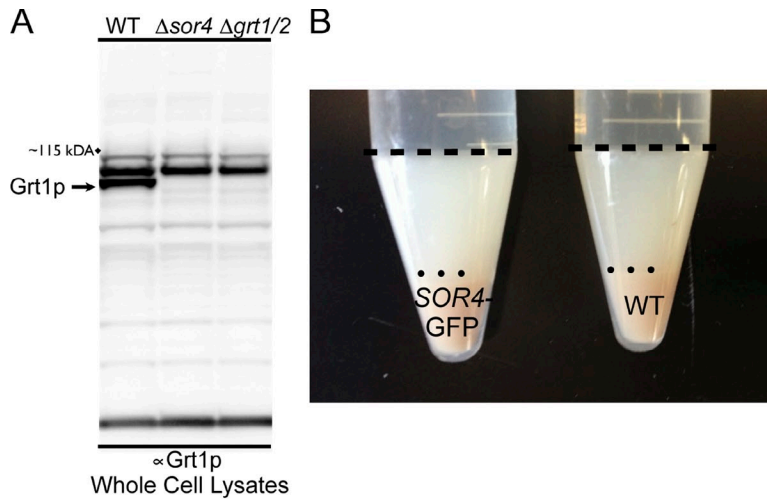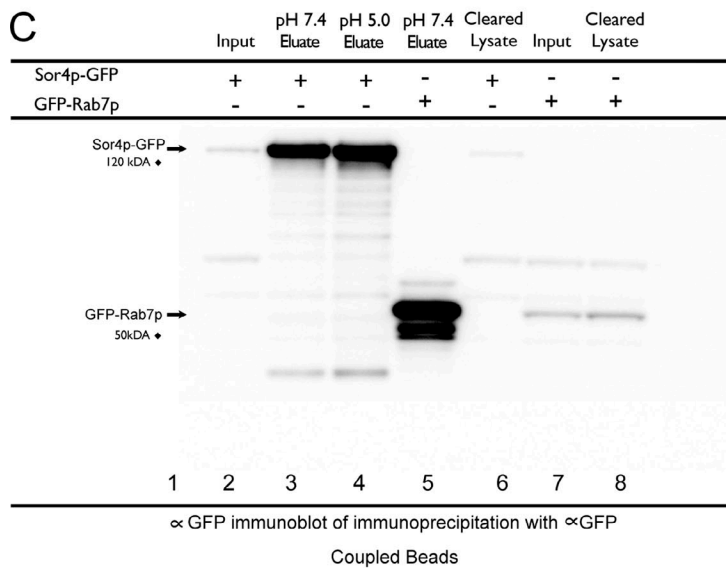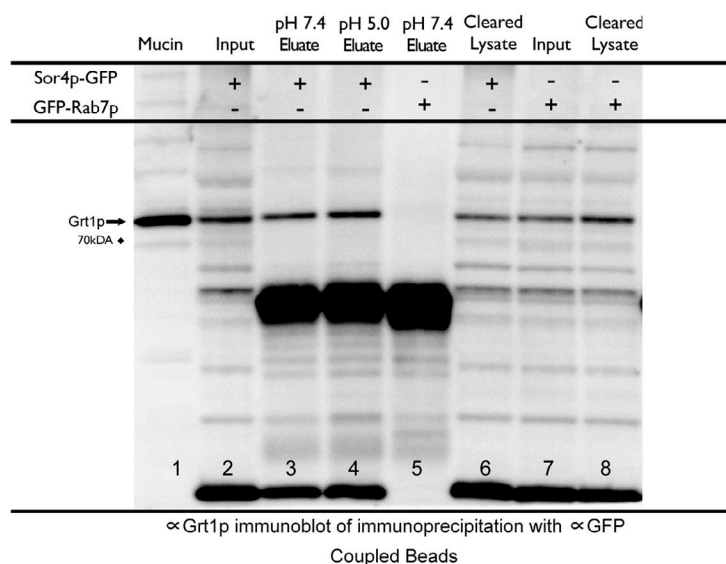

**Figure S3. Sor4p-GFP interacts with Grt1p, and is required for the transport of Grt1p to mucocysts.** (A) Uncropped version of Western blot shown in Fig. 3 C. Grt1p is present as a single band of 80 kD, whereas the additional bands represent cross-reactive proteins that are also present in the  $\Delta grt1/2$  lysate. (B) The addition of a C-terminal GFP tag to endogenous Sor4p does not impair Sor4p function, as judged by mucocyst secretion. As in Fig. 4 B, identical numbers of wild-type and SOR4-GFP cells were stimulated with dibucaine and immediately centrifuged. A two-layer pellet was observed for both samples, consisting of an upper flocculent layer (below the broken line) and lower cell pellet (below the dotted line). Similar amounts of flocculent are secreted by the SOR4-GFP and wild-type lines, demonstrating that SOR4-GFP cells do not show a  $\Delta sor4$  phenotype and that Sor4p-GFP provides Sor4p function in mucocyst formation. (C) As in Fig. 3 D, Sor4p-GFP was immunoprecipitated using anti-GFP antiserum from lysates of cells expressing Sor4p-GFP from the endogenous SOR4 locus, and that were actively synthesizing new mucocysts. Immunoprecipitated samples were analyzed by Western blotting with anti-GFP antiserum (top, lanes 3 and 4), confirming that full-length Sor4p-GFP is expressed, and with anti-Grt1p antiserum (bottom, lanes 3 and 4) to show coprecipitation of Grt1p. Lane 4 demonstrates that the interaction between Sor4p and Grt1p persists at pH 5. The specificity of the Sor4p-Grt1p interaction is further demonstrated by a sample in which GFP-Rab7p was immunoprecipitated with anti-GFP antiserum from lysates of cells expressing GFP-Rab7p, as described in Bright et al. (2010), that were actively synthesizing new mucocysts (top, lane 5). Grt1p was not coprecipitated with GFP-Rab7p (bottom, lane 5). Also shown are Input and cleared lysate lanes, each contain ~30,000 cell equivalents, from the lysate before and after bead addition, respectively.

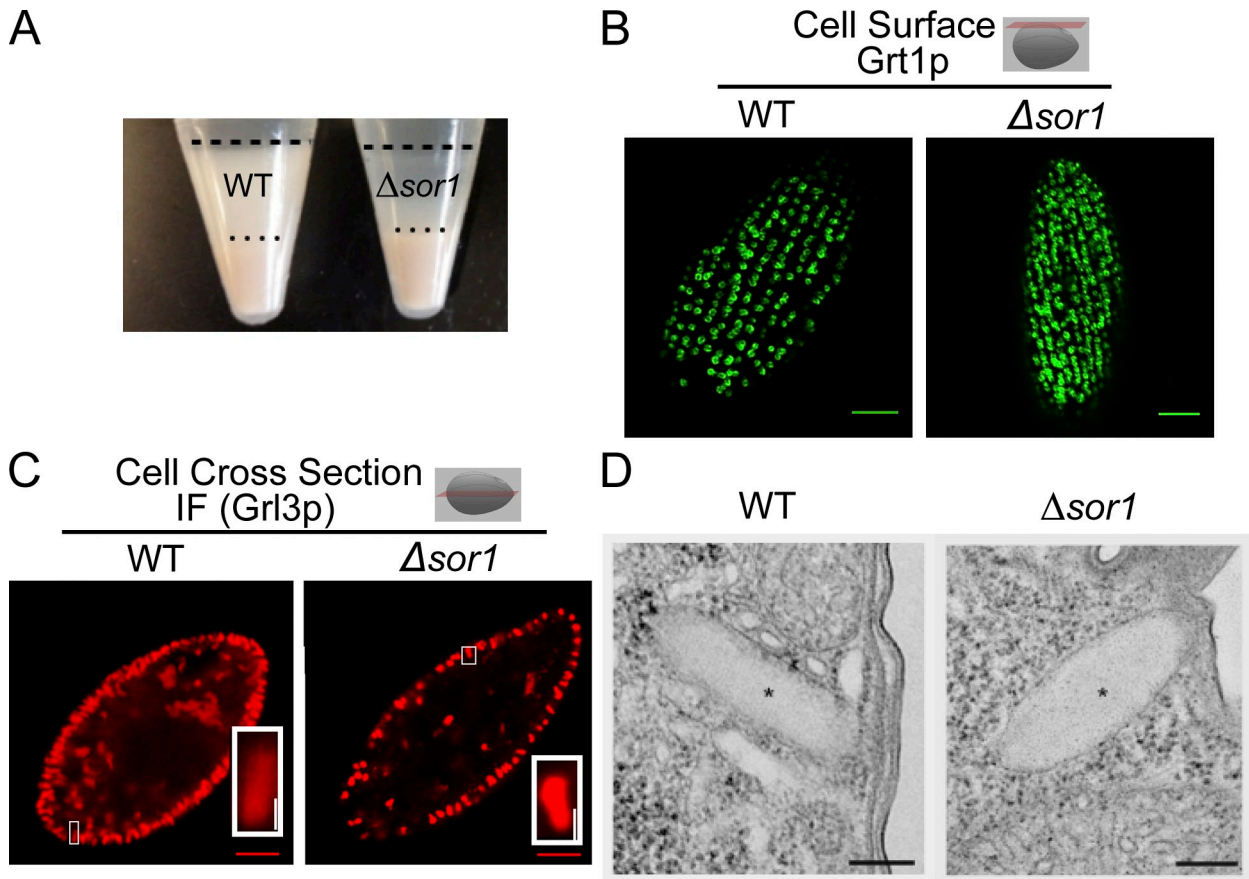

Figure S4.  **$\Delta sor1$  is not essential for mucocyst formation and secretion.** (A) A semiquantitative assay, as in Fig. 4 B and including the same wild-type control, was used to evaluate mucocyst discharge. Identical numbers of wild-type and  $\Delta sor1$  cells were stimulated with the secretagogue dibucaine, and immediately centrifuged. The wild-type culture produces a two-layer pellet, in which a thick layer of flocculent (below the broken line) resulting from mucocyst discharge sits atop of the packed cells (below the dotted line). Similar to the wild type, stimulated  $\Delta sor1$  cultures still produce a prominent flocculent layer. (B) As in Fig. 3 B, Grt1p properly localizes to mature mucocysts. Localization of Grt1p by indirect immunofluorescence shows the expected array of docked mucocysts at the surface (illustrated by the red plane in the diagram shown at the top) of wild-type (left) and  $\Delta sor1$  cells (right). Bars, 5  $\mu$ m. (C) As in Fig. 5 B and including the same wild-type control, Grl3p localizes to mature mucocysts. Visualization of mucocysts in wild-type and  $\Delta sor1$  cells by IF using mAb 5E9 against Grl3p, one of a family of proteins that assemble to form the mucocyst core. As seen in cross section, the mucocysts of  $\Delta sor1$  cells appear similar to the wild type. Insets show enlarged views of the indicated regions. Bars: (main images) 5  $\mu$ m; (insets) 0.5  $\mu$ m. (D) As in Fig. 5 C and including the same wild-type control,  $\Delta sor1$  cells produce mucocysts similar to those in wild type. Electron micrographs of docked mucocysts (labeled with asterisks) in wild-type (left) and  $\Delta sor1$  (right) cells. Bars, 200 nm.

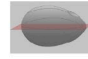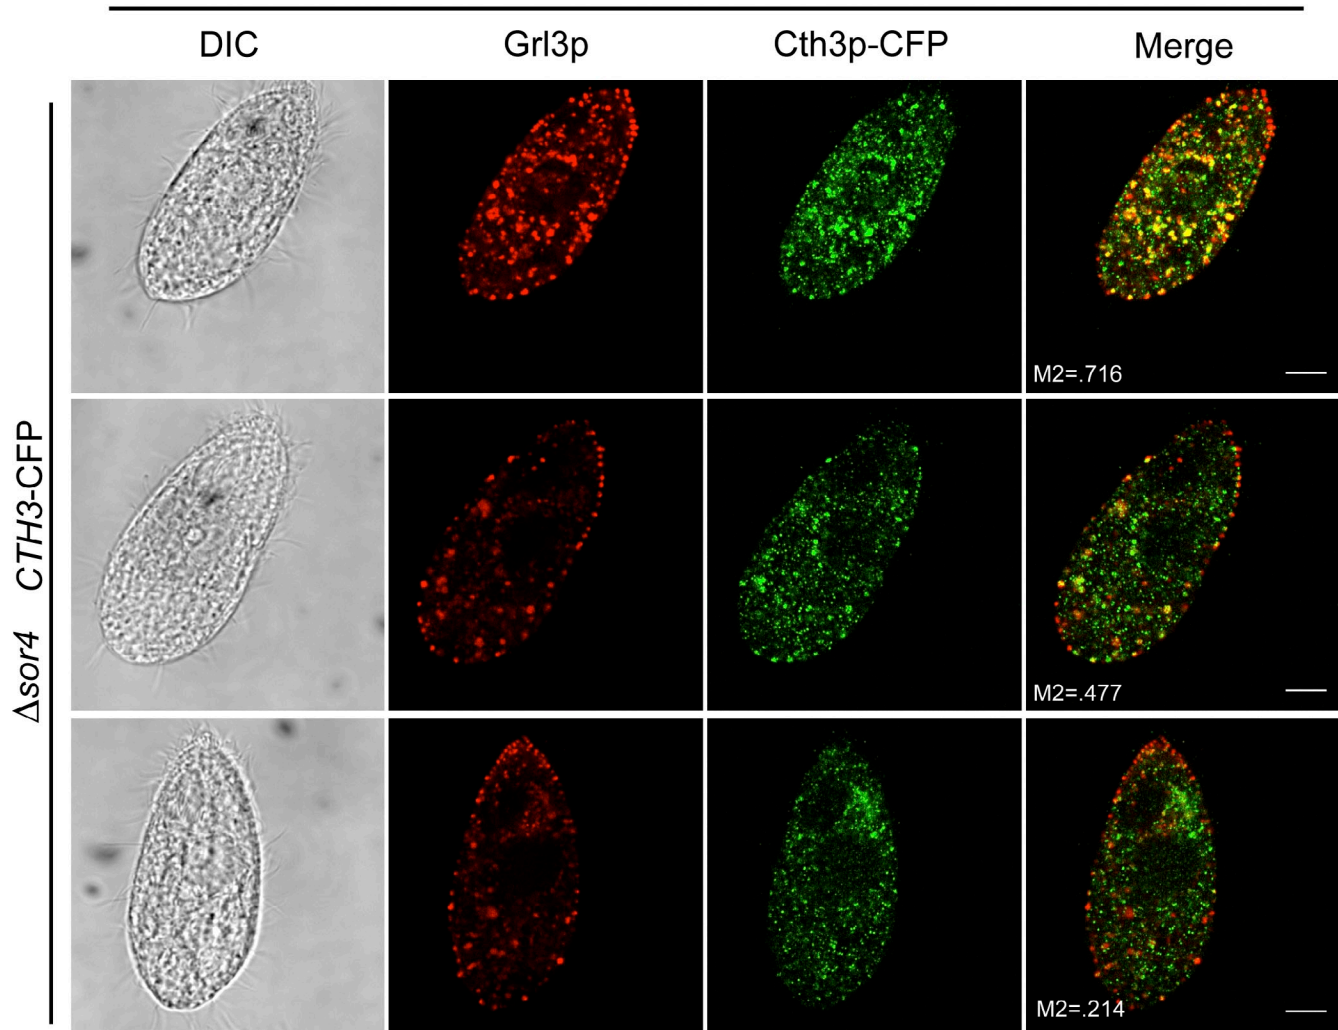

Figure S5. **Sorting efficiency of the exogenously expressed mucocyst protease Cth3p-CFP is reduced in  $\Delta sor4$  cells.** As in Fig. 6, Cth3p-CFP was inducibly expressed with 0.75  $\mu\text{g/ml}$  CdCl<sub>2</sub> for 2 h. Cth3p-CFP was localized in fixed, permeabilized cells using a polyclonal anti-GFP antibody, and endogenous Grl3p was immunolocalized using mAb 5E9. Colocalization was quantified in 15  $\Delta sor4$  cells, using the Manders' correlation coefficient M2, and a mean M2 value was determined for the population from this sample. The mean M2 value at the cell periphery for the population is 0.373 with an SEM of 0.054. A range of sample M2 values is shown as indicated in the bottom left corner of the merged image. Bars, 5  $\mu\text{m}$ .

Table S1. Accession numbers from which VPS10 domain sequences were obtained to create the phylogeny in Fig. 1 and Fig. S1

| Eukaryotic supergroup    | Subgroup                                          | Organism                               | Abbreviation | GenPept accession number |
|--------------------------|---------------------------------------------------|----------------------------------------|--------------|--------------------------|
| Archaeplastida           | Green plants                                      | <i>M. pusilla</i> CCMP1545             | Mp_1         | XP_003057805             |
|                          |                                                   | <i>O. tauri</i>                        | Ot_1         | XP_003080385             |
|                          |                                                   | <i>O. lucimarinus</i>                  | Ol_1         | XP_001418954             |
|                          |                                                   | <i>Micromonas</i> sp. RCC299           | Mr_1         | XP_002500131             |
|                          |                                                   | <i>C. subellipsoidea</i> C-169         | Cs_1         | EIE24395.1               |
| Opisthokonts             | Rhodophyta                                        | n/a                                    |              |                          |
|                          | Glaucophytes                                      | n/a                                    |              |                          |
|                          | Fungi                                             | <i>A. nidulans</i> FGSC A4             | An_1         | CBF84749                 |
|                          |                                                   | <i>P. strigosozonata</i> HHB-11173 SS5 | Ps_1         | EIN06327                 |
|                          |                                                   | <i>N. castellii</i> CBS 4309           | Nac_1        | XP_003675013             |
|                          | Metazoa                                           | <i>Y. lipolytica</i> CLIB122           | Yl_1         | XP_503576                |
|                          |                                                   | <i>P. brasiliensis</i> Pb18            | Pab_1        | C1FZI7                   |
|                          |                                                   | <i>S. cerevisiae</i>                   | Sc_1         | AAA18831                 |
|                          |                                                   | <i>T. adhaerens</i>                    | Tra_1        | XP_002118075             |
|                          |                                                   | <i>M. musculus</i>                     | Mm_1         | BAE33011                 |
|                          |                                                   | <i>D. pulex</i>                        | Dap_1        | EFX89061                 |
|                          |                                                   | <i>X. (Silurana) tropicalis</i>        | Xt_1         | XP_002941683             |
|                          |                                                   | <i>M. musculus</i>                     | Mm_2         | EDL25537                 |
|                          |                                                   | <i>H. sapiens</i>                      | Hs_1         | CAA66904                 |
|                          | Amoebozoa                                         | <i>P. pallidum</i> PN500               | Pp_1         | EFA78916                 |
| <i>D. discoideum</i> AX4 |                                                   | Dd_1                                   | XP_635902    |                          |
| <i>D. fasciculatum</i>   |                                                   | Df_1                                   | EGG20045     |                          |
| <i>D. purpureum</i>      |                                                   | Dp_1                                   | XP_003287439 |                          |
| <i>P. pallidum</i> PN500 |                                                   | Pp_2                                   | EFA75804     |                          |
| Chromalveolates/SAR      | Rhizaria                                          | n/a                                    |              |                          |
|                          | Alveolates                                        | Ciliates from Fig. 2 B/Table S2        |              |                          |
|                          | Stramenopiles (NCBI taxonomy accession no. 33634) | n/a                                    |              |                          |
| Excavata                 | Hacrobia                                          | n/a                                    |              |                          |
|                          | Malawimonadidae (accession no. 136087)            | n/a                                    |              |                          |
|                          | Euglenozoa (accession no. 33682)                  | n/a                                    |              |                          |
|                          | Heterolobosea (accession no. 5752)                | <i>N. gruberi</i> strain NEG-M         | Ng_1         | XP_002677529             |
|                          | Jakobida (accession no. 556282)                   | n/a                                    |              |                          |
|                          | Parabasalidea (accession no. 5719)                | n/a                                    |              |                          |
|                          | Fornicata (accession no. 207245)                  | n/a                                    |              |                          |
|                          | Preaxostyla, oxymonads (accession no. 66288)      | n/a                                    |              |                          |
| Preaxostyla, trimastix   |                                                   |                                        |              |                          |

n/a, not applicable.

Table S2. Accession numbers from which VPS10 domain sequences were obtained to create the phylogeny in Fig. 2 B

| Organism                             | Abbreviation | GenPept accession number |
|--------------------------------------|--------------|--------------------------|
| <i>T. thermophila</i>                | Tt_4         | XP_001033494             |
| <i>I. multifiliis</i>                | Im_1         | EGR31810                 |
| <i>P. tetraurelia</i> strain d4-2    | Pt_1         | XP_001453349             |
| <i>P. tetraurelia</i> strain d4-2    | Pt_2         | XP_001441753             |
| <i>T. thermophila</i>                | Tt_2         | XP_001020814             |
| <i>I. multifiliis</i>                | Im_2         | EGR30373                 |
| <i>P. tetraurelia</i> strain d4-2    | Pt_3         | XP_001452914             |
| <i>P. tetraurelia</i> strain d4-2    | Pt_4         | XP_001461439             |
| <i>P. tetraurelia</i> strain d4-2    | Pt_5         | XP_001456736             |
| <i>P. tetraurelia</i> strain d4-2    | Pt_6         | XP_001440903             |
| <i>P. tetraurelia</i> strain d4-2    | Pt_7         | XP_001443051             |
| <i>T. thermophila</i>                | Tt_3         | XP_001025035             |
| <i>P. tetraurelia</i> strain d4-2    | Pt_8         | XP_001443174             |
| <i>P. tetraurelia</i> strain d4-2    | Pt_9         | XP_001433415             |
| <i>P. tetraurelia</i> strain d4-2    | Pt_10        | XP_001437890             |
| <i>P. tetraurelia</i> strain d4-2    | Pt_11        | XP_001460540             |
| <i>P. tetraurelia</i> strain d4-2    | Pt_12        | XP_001441123             |
| <i>I. multifiliis</i>                | Im_3         | EGR32320                 |
| <i>T. thermophila</i>                | Tt_1         | XP_001033316             |
| <i>I. multifiliis</i>                | Im_4         | EGR29891                 |
| <b>Other alveolate hits</b>          |              |                          |
| <i>Toxoplasma gondii</i> GT1         | Tg_1         | EEE22595                 |
| <i>P. marinus</i> ATCC 50983         | Pm_1         | XP_002767067             |
| <i>N. caninum</i> Liverpool          | Nc_1         | XP_003881207             |
| <i>C. muris</i> RN66                 | Cm_1         | XP_002142105             |
| <i>C. hominis</i> TU502              | Ch_1         | XP_667982                |
| <i>P. vivax</i> Sal-1                | Pv_1         | XP_001615871             |
| <i>P. knowlesi</i> strain H          | Pk_1         | XP_002260355             |
| <i>P. cynomolgi</i> strain B         | Pc_1         | GAB68068                 |
| <i>P. yoelii</i> yoelii 17XNL        | Py_1         | XP_729406                |
| <i>P. falciparum</i> 3D7             | Pf_1         | XP_001348667             |
| <i>B. microti</i> strain RI          | Bm_1         | CCF75142                 |
| <i>P. marinus</i> ATCC 50983         | Pm_2         | XP_002781944             |
| <i>T. orientalis</i> strain Shintoku | To_1         | BAM38545                 |
| <i>T. annulata</i> strain Ankara     | Ta_1         | XP_954685                |
| <i>T. parva</i> strain Muguga        | Tp_1         | XP_765543                |

Table S3. Master primer list

| Name | 5'-3' sequence                                               | Target                                 |
|------|--------------------------------------------------------------|----------------------------------------|
| 067A | CATTAGGATCTTTAGATAATTTTGATTGAGTAGATAAGTAG                    | A207                                   |
| 067B | CTACTTATCTACTCAATCAAAATTATCTAAAGATCCTAATG                    |                                        |
| 093A | ATGCGCTAGCGGATCGATTTAAGAATGGTCTAAGGATCTTGGAATG               | Sortilin 4 C terminus minus stop codon |
| 093B | TAGAAACCATGGATCCAAGCATATCTGCATCGTATTTCATCATTG                |                                        |
| 094A | ATTCGATATCAAGCTTATCATTTAAAAAATTACTTGAGAGCATAAGC              | Sortilin 4 3' genomic flank            |
| 094B | CGGTATCGATAAGCTCTGATTGTTAAATGTTGAAAGAGATTTTTATGAGAAG         |                                        |
| 109A | TAGAGCATGCGCTAGCGTAAAACGCTGTTTATTTTCATATCTGTTATGTTAAATG      | Sortilin 4 5' genomic flank            |
| 109B | TGTATATCGAATTCCTGCAGCTAAAAGATTGCTTTTTGTAATTTCTATGATTTAAGAG   |                                        |
| 084B | TAGAAACCATGGATCCATCATAATGACTCTCTTCATCTGGTTATCAG              | Sortilin 1 C terminus minus stop codon |
| 087  | ATGCGCTAGCGGATCAACAAGAATCTGTTTGCTTAAATGGAGAAG                |                                        |
| 088A | ATTCGATATCAAGCTTAATTAATAATTGATTTTTGTTTTTCATAAATTTCTTTGTAG    | Sortilin 1 3' genomic flank            |
| 088B | CGGTATCGATAAGCTTGATTACGACAAATTCATATGCCATTTTC                 |                                        |
| 089A | ATGCGCTAGCGGATCGGAATGTGACTTCGGTTTCTACAG                      | Sortilin 2 C terminus minus stop codon |
| 089B | TAGAAACCATGGATCCATCGTAATCTTCTTAATAATAGTAATCTTCTGATCTC        |                                        |
| 090A | ATTCGATATCAAGCTTATTAATAAACAATTTCTTCATTTAATTAATTTGTAAG        | Sortilin 2 3' genomic flank            |
| 090B | CGGTATCGATAAGCTAACTAGAATATTAATTGCTAAAAGTCAAAAATCT            |                                        |
| 091A | ATGCGCTAGCGGATCTGCTAAAGACGATAGCAAAGAAAGAAC                   | Sortilin 3 C terminus minus stop codon |
| 091B | TAGAAACCATGGATCCATTTCTAGGATCAAAGGATCTTCTTCAC                 |                                        |
| 092A | ATTCGATATCAAGCTTAAAAATAATTGACTGAATAATATTGCTAATTTATTTTTTAC    | Sortilin 3 3' genomic flank            |
| 092C | CGGTATCGATAAGCTGAAGATAAATTTGCTTCAATCATTGCTCAG                |                                        |
| 106A | TAGAGCATGCGCTAGCCTCAGTCTGGATTAGGCAGCTAG                      | Sortilin 1 5' genomic flank            |
| 106B | TGTATATCGAATTCCTGCAGAAGATATTTAATCACTTAATAACTAAGTCTGTTTCTCATG |                                        |
| 107A | TAGAGCATGCGCTAGCGTATTCTAATTGAAGAATAAGTAAATTCCTTTTTATCATAACAC | Sortilin 2 5' genomic flank            |
| 107B | TGTATATCGAATTCCTGCAGACTTCCTCTGATTTCTTAACAAAGTAATTC           |                                        |
| 108A | TAGAGCATGCGCTAGCTTCCACTTTTATGATTGGATAATTGTATAGAAGAATTATG     | Sortilin 3 5' genomic flank            |
| 108B | TGTATATCGAATTCCTGCAGACTATTTTTTCTCTCAATTTCTTTTCAAGGAT TTG     |                                        |
| S001 | CACCATGAGAAGAAGCTTGCTTACAGTAG                                | CTH3 ORF minus stop codon              |
| S002 | ATGCTTGGCAAAGCAAACC                                          |                                        |

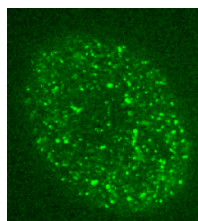

Video 1. **Sor4p localizes to mobile cytoplasmic puncta and not to mature mucocysts docked at the plasma membrane.** Real-time live imaging of immobilized *T. thermophila* expressing Sor4p-GFP at the endogenous *SOR4* locus as a complete gene replacement. Images were acquired with a 100-ms exposure (Marianas Yokogawa type spinning disk inverted confocal microscope; 3i) and displayed in the video at 10 frames/s. There is no detectable Sor4p-GFP in docked mucocysts.

**An ImageJ macro that selects a band at the cell periphery for colocalization analysis with the JACoP plugin using user defined thresholds and a variation on the 3 x 3 2D Median Hybrid Filter ImageJ plugin are available for download as a ZIP file.**

## Reference

Bright, L.J., N. Kambesis, S.B. Nelson, B. Jeong, and A.P. Turkewitz. 2010. Comprehensive analysis reveals dynamic and evolutionary plasticity of Rab GTPases and membrane traffic in *Tetrahymena thermophila*. *PLoS Genet.* 6:e1001155. <http://dx.doi.org/10.1371/journal.pgen.1001155>
